1 Full title

2 The association between medical accessibility and glycemic status in patients with  
3 type 2 diabetes mellitus: A retrospective study in Taiwan rural population

4

5 Short title

6 Medical accessibility and glycemic status

7

8 Chong-Fong Sun<sup>1</sup>, Bo-Lin Pan<sup>1</sup>, Pei-Ming Wang<sup>1</sup>, Kun-Siang Huang<sup>1</sup>, Yueh-Chien

9 Lu<sup>1</sup>, Hsin-Yi Kung<sup>2</sup>, Jui-Chin Chiang<sup>1,\*</sup>

10

11 <sup>1</sup> Department of Family Medicine, Kaohsiung Chang Gung Memorial Hospital,  
12 Kaohsiung City, Taiwan

13 <sup>2</sup> Department of Nursing, Kaohsiung Chang Gung Memorial Hospital, Kaohsiung  
14 City, Taiwan

15 \* Corresponding author

16 Email: [margery@cgmh.org.tw](mailto:margery@cgmh.org.tw) (Jui-Chin Chiang)

17

NOTE: This preprint reports new research that has not been certified by peer review and should not be used to guide clinical practice.

## 18 **Abstract**

## 19 **Introduction**

20 Type 2 diabetes mellitus represents a significant chronic health concern, with rural  
 21 populations being particularly vulnerable due to geographic and socio-economic  
 22 barriers to healthcare access. To date, few studies have focused on the medical  
 23 accessibility of rural diabetic patients in Taiwan. This study aims to explore the  
 24 association between the proximity to healthcare facilities and glycohemoglobin levels  
 25 in the rural Taiwanese population.

## 26 **Methods**

27 We conducted a retrospective cross-sectional study in rural districts of southern  
 28 Taiwan. Medical accessibility was calculated from subject's address to medical units  
 29 by Google Maps platform. Spearman's Rank Analysis was performed for the  
 30 correlation between distance from patient's address to medical units and  
 31 glycohemoglobin level. Logistic regression was applied to identify factors associated  
 32 with glycemic control.

## 33 **Results**

34 In total, 117 patients with type 2 diabetes mellitus were enrolled (mean  
35 glycohemoglobin:  $8.17 \pm 1.92\%$ ). Glycohemoglobin level was modestly and positively  
36 associated with distance to clinic (Rho: 0.252) and hospital (Rho: 0.241) respectively.  
37 In logistic regression analysis, good glycemic control (glycohemoglobin less than 7%)  
38 was associated with covariates as not-working status, the address district near  
39 downtown, fasting plasma glucose equal to or less than 130 mg/dL, and normal high-  
40 density lipoprotein cholesterol level.

## 41 **Conclusion**

42 Our study reveals that accessibility to healthcare facility is modestly correlated with  
43 long-term glycemic status in Taiwan rural diabetic population. Besides, we also  
44 identified several protective factors associated with chronic glycemic status. These  
45 findings may pave the way for improvement of policy and healthcare strategies in  
46 rural diabetic care.

47

48

49

50

51

52

## 53 Introduction

54 Type 2 Diabetes Mellitus (T2DM) is the predominant form of diabetes worldwide,  
 55 comprising approximately 90% of all cases. According to the 10th edition of the  
 56 International Diabetes Federation Atlas, the global diabetic population is projected to  
 57 reach 783.2 million by 2045, marking an increase of nearly 50% from the estimates  
 58 made in 2019[1]. The prevalence of diabetes mellitus in Taiwan aligns with this  
 59 global upward trend. Data from a retrospective longitudinal cohort study using the  
 60 Taiwan National Health Insurance Research Database indicated a 66% increase in the  
 61 diabetic population from 2005 to 2014[2]. T2DM is defined by chronic  
 62 hyperglycemia, which can silently damage multiple organs. If not properly managed,  
 63 T2DM can lead to severe complications such as stroke, blindness, and amputation of  
 64 lower extremities, thereby disabling individuals and imposing significant economic  
 65 and healthcare burdens. Bommer, C. et al. highlighted that global healthcare  
 66 expenditures for diabetes among individuals aged 20-79 increased from USD 232  
 67 billion in 2007 to USD 966 billion in 2021[3]. In Taiwan, the frequency of outpatient  
 68 visits by T2DM patients is roughly double that of the average patient[4]. Patients with  
 69 diabetic complications also tend to have more emergency room visits and  
 70 hospitalizations, which result in higher and rising costs under Taiwan's National  
 71 Health Insurance program[4, 5].

72

73 Effective prevention of diabetic complications hinges on self-care and regular medical  
 74 check-ups, considered as the foundation of diabetes management[1, 6]. However, it is  
 75 challenging for rural T2DM patients to access continuous diabetic care due to  
 76 geographical and financial barriers. Dugani, S. B. et al. reported that rural populations  
 77 in the United States have a higher prevalence of T2DM and diabetic hospital mortality  
 78 rates-16% and 20%, respectively-compared to urban populations[7]. Similarly, an  
 79 observational study in rural China found that nearly 60% of diabetics were unaware of  
 80 their health condition, and 40% of those diagnosed with T2DM were not receiving  
 81 treatment[8]. These factors contribute to the higher incidence of diabetes-related  
 82 complications among rural populations. In Taiwan, national database studies have  
 83 shown that rural T2DM patients are more likely to develop ischemic heart disease,  
 84 lower limb ulcers, stroke, congestive heart failure, end-stage renal disease, and  
 85 blindness[5]. Additionally, delayed detection of diabetic neuropathy and an  
 86 approximately 50% higher prevalence of lower limb amputations were reported[9,  
 87 10]. Rural T2DM patients also have a higher risk of preventable hospitalizations  
 88 compared to their urban counterparts[11].

89

90 Considering the rural-urban disparities, recent studies have explored the impact of

distance to healthcare facilities on diabetes management[12-16]. Nevertheless, to our knowledge, no study has specifically addressed this issue in Taiwan. This study aims to illuminate the relationship between geographic accessibility and long-term glycemic control, and to identify protective factors that promote good glycemic management in Taiwan's rural diabetic population.

## Methods

### Study design and subjects

We conducted a retrospective, cross-sectional study in two rural districts, Jia-Sian and Shan-Lin, in southern Taiwan, spanning from January 2009 to December 2022. The study participants were selected from those using the outpatient service of the Mobile Health Care program. This public program, initiated by the Taiwanese government's Ministry of Health and Welfare in 2002, aims to mitigate urban-rural health disparities. It mobilizes medical teams from urban medical centers to provide daily outpatient care, perform routine blood tests, and prescribe medications at public venues like temples or community centers. During the study period, a total of 3,082 individuals utilized this outpatient service. After verifying their T2DM diagnoses and excluding those with unavailable addresses, 117 subjects were finally included in this study (Fig. 1). The Chang Gung Medical Foundation's Institutional Review Board

approved this study (IRB No. 202301135B0).

## **Fig 1. Flow chart of subject inclusion in this study.**

Abbreviations: T2DM, Type 2 diabetes mellitus; HbA1c, glycohemoglobin

## **Data collection and laboratory methods**

We started to retrospectively access patients' data after improvement of the Chang Gung Medical Foundation's Institutional Review Board on September 1<sup>st</sup>, 2023. Medical records and laboratory data for the study were extracted from the database of Kaohsiung Chang Gung Memorial Hospital, which the urban medical team belonged to. Patient profiles were compiled from the initial visit forms filled out by patients with the help of medical staff. Venous blood samples were collected from patients following a minimum of 8 hours of overnight fasting. Fasting plasma glucose level was measured by enzymatic method. Total cholesterol (TC), high-density lipoprotein cholesterol (HDL-C), and triglyceride (TG) were measured by colorimetric method. Low-density lipoprotein cholesterol (LDL-C) level was calculated by Friedewald Formula ( $LDL-C = TC - HDL-C - TG/5$ ). HbA1c level was quantified through High Performance Liquid Chromatography (HPLC), and proteinuria was assessed by using a urine test that employs reflective photometry. During data collection and analysis, all subjects' data were de-identified. The author responsible for collecting addresses and processing related data handled this personal information independently, and he

did not have access to other patients' data.

## Definition of T2DM

T2DM was defined according to diagnostic criteria outlined by Diabetes Care 2023[17]. The criteria include: (1) a patient with classic symptoms of hyperglycemia and a random plasma glucose  $\geq 200$  mg/dL, or (2) a patient has at least two records of fasting plasma glucose  $\geq 126$  mg/dL or (3) HbA1c  $\geq 6.5\%$ . Additionally, subjects who had been diagnosed with T2DM or who were taking anti-diabetic medications were also considered as having T2DM.

## Variables

In this study, we measured geographic accessibility to diabetic care by calculating the distance from a patient's residence to the nearest medical facility, such as a hospital or clinic, using the Google Maps platform. HbA1c was employed as the surrogate of long-term glycemic status. To mitigate potential confounding effects from the medical services provided by the urban medical team of the Mobile Health Care program, we considered only HbA1c values obtained within three months before or after the patient's initial visit. HbA1c levels were categorized into two groups: "good control," defined as levels below 7%, and "poor control," defined as levels equal to or



exceeding 7%.

## Covariates

We categorized other variables into general data, past history, and laboratory data.

General data included: (1) age, grouped as under 65 or 65 and older; (2) gender, classified as male or female; (3) employment status, either employed or not working; (4) education level, categorized as unschooled, elementary school, junior high school, or senior high school and above; (5) district, either Jia-Sian or Shan-Lin; (6) lifestyle factors, including current smoking, drinking, and betelnut use. Past history contained cardiovascular diseases, hypertension, chronic hepatitis, stroke, chronic kidney disease, malignancy, and surgical interventions. Laboratory data comprised fasting plasma glucose, lipid profiles (total cholesterol, LDL-C, HDL-C, and triglycerides), and proteinuria. Fasting plasma glucose levels of 130 mg/dL or lower, HDL-C levels of 40 mg/dL or higher in men and 50 mg/dL or higher in women, and triglyceride levels below 150 mg/dL were defined as “good control” following the recommendations from Diabetes Care 2023[17]. Total cholesterol levels below 160 mg/dL and LDL-C levels under 100 mg/dL were also considered “good control” based on the suggestion from the Diabetes Association of the Republic of China (Taiwan) [18]. Proteinuria was classified as positive (ranging from 1+ to 4+) or

negative (trace and negative).

## Statistical analysis

General characteristics of subjects were presented by means and standard deviations (SD) for continuous variables and percentages for categorical variables. To explore the relationship between HbA1c levels and geographic distance to medical facilities, Spearman's rank correlation test was employed. Chi-Square test of independence and Fisher's exact test were used for categorical variables, depending on the expected numbers in classes. Logistic regression was utilized to estimate the odds ratio of categorical variables. All statistical analyses were conducted by using IBM SPSS software, version 22.0. All tests were two-sided, and *p*-values less than 0.05 were considered statistically significant.

## Result

### General characteristics

As presented in Table 1, the study population predominantly consisted of midlife to elderly adults, with an average age of 64.79 ( $\pm 11.20$ ) years. Approximately 60% of the participants were female. The majority of subjects had a relatively low level of education, with 73.4% attaining primary school education or less. Regarding

188 residential districts, a higher proportion of patients (63.2%) resided in the Shan-Lin  
189 district. Among past medical histories, hypertension emerged as the most prevalent  
190 disease, affecting 76.1% of the subjects. Cardiovascular and chronic kidney diseases  
191 were the next most common conditions, occupying 27.4% and 15.4% of the  
192 participants, respectively.  
193

**Table 1. General characteristics**

| Characteristics                   | Categories                | All(n%)           |
|-----------------------------------|---------------------------|-------------------|
| Total                             |                           | 117(100.0)        |
| General data                      |                           |                   |
| Age(years)                        | Mean $\pm$ SD             | 64.79 $\pm$ 11.20 |
|                                   | $\geq 65$                 | 54(46.2)          |
| Sex                               | Female                    | 70(59.9)          |
| Education level                   | Unschool                  | 39(33.3)          |
|                                   | $\leq$ Primary school     | 47(40.1)          |
|                                   | $\leq$ Junior high school | 20(17.1)          |
|                                   | $\geq$ Senior high school | 11(9.4)           |
| Employed status                   | Working                   | 81(69.2)          |
| District                          | Jia-Sian                  | 43(36.8)          |
|                                   | Shan-Lin                  | 74(63.2)          |
| Distance to nearest clinic (km)   | Mean $\pm$ SD             | 4.26 $\pm$ 3.71   |
| Distance to nearest hospital (km) | Mean $\pm$ SD             | 21.68 $\pm$ 10.90 |
| Current smoking                   | Yes                       | 24(20.5)          |
| Current drinking                  | Yes                       | 21(17.9)          |

|                                |                   |                    |
|--------------------------------|-------------------|--------------------|
| Current betelnut using         | Yes               | 9(7.7)             |
| Past history                   |                   |                    |
| Cardiovascular diseases        | Yes               | 32(27.4)           |
| Hypertension                   | Yes               | 89(76.1)           |
| Chronic hepatitis              | Yes               | 11(9.4)            |
| Stroke                         | Yes               | 9(7.7)             |
| Chronic kidney disease         | Yes               | 18(15.4)           |
| Malignancy                     | Yes               | 4(3.4)             |
| Surgical intervention          | Yes               | 60(51.3)           |
| Laboratory data                |                   |                    |
| Fasting plasma glucose (mg/dL) | Mean $\pm$ SD     | 150.67 $\pm$ 50.77 |
|                                | $\leq 130$        | 45(38.5)           |
|                                | $>130$            | 58(49.6)           |
| HbA1c (%)                      | Mean $\pm$ SD     | 8.17 $\pm$ 1.92    |
|                                | $< 7$             | 36(30.8)           |
|                                | $\geq 7$          | 81(69.2)           |
| Total cholesterol (mg/dL)      | Mean $\pm$ SD     | 200.45 $\pm$ 49.02 |
|                                | $< 160$           | 24(20.5)           |
|                                | $\geq 160$        | 86(73.5)           |
| LDL-C (mg/dL)                  | Mean $\pm$ SD     | 107.12 $\pm$ 38.56 |
|                                | $< 100$           | 41(35.0)           |
|                                | $\geq 100$        | 57(48.7)           |
| HDL-C (mg/dL) in total         | Goal-achieved     | 61(52.1)           |
|                                | Not goal-achieved | 38(32.5)           |
| HDL-C (mg/dL) in men           | Mean $\pm$ SD     | 48.07 $\pm$ 14.09  |
|                                | $\geq 40$         | 29(24.8)           |

|                        |           |               |
|------------------------|-----------|---------------|
|                        | < 40      | 14(12.0)      |
| HDL-C (mg/dL) in women | Mean ± SD | 54.93±13.77   |
|                        | ≥ 50      | 38(32.5)      |
|                        | < 50      | 18(15.4)      |
| TG (mg/dL)             | Mean ± SD | 221.51±249.68 |
|                        | < 150     | 48(41.0)      |
|                        | ≥ 150     | 59(50.4)      |
| Proteinuria            | No        | 75(64.1)      |
|                        | Yes       | 30(25.6)      |

Abbreviations: HbA1c, glycohemoglobin; SD, standard deviation; LDL-C, low-density lipoprotein cholesterol; HDL, high-density lipoprotein cholesterol; TG, triglyceride

194

195 **Glycemic status and geographic accessibility**

196 The overall mean HbA1c level among the subjects was 8.17% (±1.92), with  
197 approximately 70% of the T2DM patients in this study categorized within the “poor  
198 control” group (HbA1c ≥ 7%). The average distance from the patient's residence to  
199 the nearest clinic was 4.26 kilometers (±3.71), and to the nearest hospital was 21.68  
200 kilometers (±10.90). According to Spearman’s rank correlation test, as shown in  
201 Table 2, there was a modest correlation between the distance to both the hospital or  
202 clinic and the HbA1c levels, suggesting that greater geographic distances to medical  
203 facilities may be associated with poorer glycemic control.

204

**Table 2. Result of Spearman's Rank Correlation Analysis**

|                                  | Correlation coefficient (Rho) | <i>p</i> -value |
|----------------------------------|-------------------------------|-----------------|
| Distance to the nearest clinic   | 0.252                         | 0.006*          |
| Distance to the nearest hospital | 0.241                         | 0.009*          |
| <hr/>                            |                               |                 |
| * <i>p</i> < 0.05                |                               |                 |

## Glycemic control and categoric variables

As presented in Table 3, good glycemic control was significantly associated with several covariates, including employment status (*p* = 0.010), residential district (*p* = 0.010), control of fasting plasma glucose (*p* = 0.003), triglyceride levels (*p* = 0.049), and high-density lipoprotein cholesterol levels (*p* = 0.020). We further applied logistic regression to assess the influence of these factors on glycemic control, with the findings presented in Table 4. Both of univariate and multivariate analysis indicated that unemployment, residing in the Shan-Lin district, achieving target fasting plasma glucose levels, and maintaining optimal HDL-C levels were factors statistically associated with good glycemic control.

**Table 3. Results of Chi-square test or Fisher's exact test for glycemic control and categorical variables**

| Characteristics | Categories | HbA1c < 7% (n) | HbA1c ≥ 7% (n) | <i>p</i> -value |
|-----------------|------------|----------------|----------------|-----------------|
| General data    |            |                |                |                 |
| Age(years)      | <65        | 15             | 48             | 0.078           |
|                 | ≥65        | 21             | 33             |                 |
| Sex             | Male       | 15             | 32             | 0.826           |
|                 | Female     | 21             | 49             |                 |

|                         |                     |    |    |        |
|-------------------------|---------------------|----|----|--------|
| Education level         | Unschool            | 11 | 28 | 0.451  |
|                         | ≤Primary school     | 12 | 35 |        |
|                         | ≤Junior high school | 8  | 12 |        |
|                         | ≥Senior high school | 5  | 6  |        |
| Employed status         | Not working         | 17 | 19 | 0.010* |
|                         | Working             | 19 | 62 |        |
| Address district        | Jia-Sian            | 7  | 36 | 0.010* |
|                         | Shan-Lin            | 29 | 45 |        |
| Current smoking         | No                  | 27 | 66 | 0.423  |
|                         | Yes                 | 9  | 15 |        |
| Current drinking        | No                  | 29 | 67 | 0.799  |
|                         | Yes                 | 7  | 14 |        |
| Betelnut using          | No                  | 32 | 76 | 0.454  |
|                         | Yes                 | 4  | 5  |        |
| <hr/>                   |                     |    |    |        |
| Past history            |                     |    |    |        |
| Cardiovascular diseases | No                  | 25 | 60 | 0.604  |
|                         | Yes                 | 11 | 21 |        |
| Hypertension            | No                  | 11 | 16 | 0.213  |
|                         | Yes                 | 25 | 64 |        |
| Chronic hepatitis       | No                  | 33 | 73 | 1.000  |
|                         | Yes                 | 3  | 8  |        |
| Stroke                  | No                  | 32 | 76 | 0.454  |
|                         | Yes                 | 4  | 5  |        |
| Chronic kidney disease  | No                  | 27 | 72 | 0.055  |
|                         | Yes                 | 9  | 9  |        |

|                                |                   |    |    |        |
|--------------------------------|-------------------|----|----|--------|
| Malignancy                     | No                | 36 | 77 | 0.310  |
|                                | Yes               | 0  | 4  |        |
| Surgical intervention          | No                | 16 | 40 | 0.580  |
|                                | Yes               | 20 | 40 |        |
| Laboratory data                |                   |    |    |        |
| Fasting plasma glucose (mg/dL) | ≤ 130             | 20 | 25 | 0.003* |
|                                | > 130             | 10 | 48 |        |
| Total cholesterol (mg/dL)      | < 160             | 5  | 19 | 0.447  |
|                                | ≥ 160             | 27 | 59 |        |
| LDL-C (mg/dL)                  | < 100             | 13 | 28 | 0.727  |
|                                | ≥ 100             | 20 | 37 |        |
| HDL-C (mg/dL) in total         | Goal-achieved     | 23 | 38 | 0.020* |
|                                | Not goal-achieved | 6  | 32 |        |
| HDL-C (mg/dL) in men           | ≥ 40              | 9  | 20 | 1.000  |
|                                | < 40              | 5  | 9  |        |
| HDL-C (mg/dL) in women         | ≥ 50              | 14 | 24 | 0.021* |
|                                | < 50              | 1  | 17 |        |
| TG (mg/dL)                     | < 150             | 18 | 30 | 0.049* |
|                                | ≥ 150             | 12 | 47 |        |
| Proteinuria                    | No                | 25 | 50 | 0.315  |
|                                | Yes               | 7  | 23 |        |

Abbreviations: HbA1c, glycohemoglobin; SD, standard deviation; LDL-C, low-density lipoprotein cholesterol; HDL, high-density lipoprotein cholesterol; TG, triglyceride

\* $p < 0.05$

**Table 4. Logistic regression of variables associated with good control of HbA1c**



| Variables                      | Categories                 | OR <sup>1</sup> (95% CI) | aOR <sup>2</sup> (95% CI) |
|--------------------------------|----------------------------|--------------------------|---------------------------|
| Employed status                | Not working                | 0.34* (0.15-0.79)        | 0.30* (0.11-0.79)         |
| District                       | Shan-Lin                   | 0.30* (0.12-0.77)        | 0.26* (0.10-0.69)         |
| Fasting plasma glucose (mg/dL) | ≤ 130                      | 0.26* (0.11-0.64)        | 0.23*(0.09-0.60)          |
| HDL-C (mg/dL)                  | Goal-achieved <sup>3</sup> | 0.31* (0.11- 0.85)       | 0.29*(0.10-0.83)          |
| TG (mg/dL)                     | < 150                      | 0.43 (0.18-1.01)         | 0.51 (0.20-1.28)          |

1. Odds ratio of univariate logistic regression.

2. Odds ratio adjusted with age, sex, and education level.

3. Goal of HDL-C in men, 40 mg/dL; women, 50 mg/dL

Abbreviations: HbA1c, glycohemoglobin; HDL, high-density lipoprotein cholesterol; TG, triglyceride; OR, odds ratio; aOR, adjusted odds ratio; CI, confidence interval

\* $p < 0.05$

218

## 219 Discussion

220 The primary objective of this study is to uncover the relationship between geographic  
221 accessibility and long-term glycemic status among rural Taiwanese populations with  
222 type 2 diabetes mellitus. Our findings, as manifested in Table 2, reveal a modest but  
223 positive correlation between the distance from a patient's residence to both primary  
224 (clinic) and secondary (hospital) healthcare facilities and HbA1c level. This  
225 extrapolates that rural T2DM patients residing further from medical units are more  
226 likely to experience chronic hyperglycemia. This observation may help explain the  
227 higher rates of diabetic complications and the risk of avoidable hospitalizations noted  
228 in previous Taiwanese rural studies[9-11]. The influence of geographical location on

glycemic control corroborates findings from studies in other countries. In the United States, Strauss, K. et al. observed that rural diabetics with longer driving distances from home to primary care providers tended to exhibit poor glycemic control[16]. Similarly, in a Pennsylvanian study, Zgibor, J. C. et al. found that T2DM patients living within 10 miles of a medical center were 2.5 times more likely to have lower HbA1c levels between first and last office visits[19]. However, a Japanese rural study reported inconsistent spatial effects in different medical units of reference. According to R. Fukuoka et al., HbA1c level was found to be associated with distance to secondary medical facilities rather than primary ones[13]. In the author's opinion, the discrepancy is possibly related to patients' preference on specialized doctor in larger hospitals. Interestingly, in our study, distance to the nearest clinic and hospital share similar correlation coefficient (Rho: 0.252 versus 0.241), despite a notable difference in average distances (4.26 km versus 21.68 km). This indicates that clinics seem to play as a comparable role to hospitals which typically offer more advanced devices and a greater number of specialists in this study. This counter-intuitive finding could be attributed to Taiwan government's promotion of diabetic care utilization in clinics. According to national statistics, diabetic treatment in outpatient care has been evenly distributed among clinics, hospitals, and medical centers since 2009[4]. Additionally, nationwide studies in Taiwan have indicated a reduction in the rural-urban disparity in

248 diabetic care at primary health units[11, 20], reflecting effective public health  
 249 strategies to enhance accessibility and care continuity for rural populations.  
 250  
 251 In addition to spatial factors, our study also examined social and biochemical  
 252 determinants that may influence glycemic control. Notably, nearly half of the study's  
 253 participants were elderly, double the proportion of geriatric individuals in the global  
 254 diabetic population[21]. Aging population rises a concern that healthcare providers in  
 255 rural region need to pay more attention to geriatric complications. Furthermore, the  
 256 majority of our subjects had an education level below junior high school. Low  
 257 educational attainment has been linked to increased risks of developing conditions  
 258 such as coronary heart disease, chronic kidney disease, and diabetic foot[22-24].  
 259 Comorbidities such as hypertension and cardiovascular diseases were prevalent  
 260 among our subjects, aligning with findings from previous rural studies in Taiwan that  
 261 reported a 12% higher risk of cardiovascular events compared to the urban diabetic  
 262 population[5].  
 263  
 264 Our logistic regression analysis identified several variables associated with better  
 265 glycemic control ( $HbA1c < 7\%$ ). Not-working status seemed to be a protective factor  
 266 against chronic glycemia. In rural settings, non-working individuals were often

267 retirees or homemakers who may have more time to engage in health-promoting  
 268 activities such as exercising, maintaining healthy diets, and participating in health  
 269 education programs at medical facilities. Another key finding was that T2DM patients  
 270 living in Shan-Lin district were more likely to experience good glycemic control.  
 271 Given that Shan-Lin district is closer to the hospital and downtown compared to Jia-  
 272 Sian, this could suggest a link between proximity to healthcare resources and long-  
 273 term glycemic control. However, further qualitative study is needed to explore other  
 274 socio-economic factors that might influence this association. Additionally, achieving  
 275 goals for fasting glucose and HDL-C were both positively correlated with controlled  
 276 HbA1c levels. Previous studies have documented the close relationship between  
 277 fasting glucose levels and HbA1c[25, 26]. Moreover, HDL dysfunction has been  
 278 shown to adversely affect pancreatic  $\beta$ -cell function and insulin sensitivity in muscle  
 279 tissues[27], which may exacerbate the progression of T2DM[28]. In rural diabetic  
 280 care, healthcare providers often face challenges in regularly assessing patients' HbA1c  
 281 levels. Recognizing the factors discussed above can be beneficial in evaluating  
 282 patients' long-term glycemic status and tailoring appropriate interventions. This  
 283 holistic approach is essential for improving diabetes management and outcomes in  
 284 rural populations.  
 285

This study has several limitations that warrant consideration. Firstly, the relatively small sample size of T2DM patients may lead to wide confidence intervals of odds ratio in the logistic regression analysis. This limitation likely arises from the stringent inclusion criteria that subjects have HbA1c values measured within three months of their initial visit to the Mobile Health Care outpatient service. To more precisely determine the influence among factors on glycemic control, larger cohort studies are necessary. Secondly, some critical factors that may be related to glycemic control, such as body mass index, duration of T2DM, marital status, and income, were not available in this retrospective study. The absence of these variables could limit the comprehensiveness and accuracy of our findings. Thirdly, distance calculated by Google Maps from a patient's address to the nearest medical unit may not perfectly reflect geographic accessibility. Patients may choose different routes or utilize various transportation to medical units, introducing variability that could reduce the precision of the estimates. However, given the paucity of medical facilities and inconvenient public transportation in the rural areas studied, assuming that the distance to the nearest clinic or hospital reasonably represents the geographic burden faced by patients in accessing diabetic care remains a practical and justified approach.

## Conclusion

This study highlights the influence of geographic accessibility and socio-economic factors on long-term glycemic control in rural diabetic patients in Taiwan. By demonstrating a positive correlation between distance to medical facilities and HbA1c levels, our findings suggest that patients residing further from healthcare resources tend to experience poorer glycemic control. This geographical challenge underscores the necessity for policy makers to consider distance as a significant factor in rural diabetes management. Moreover, our research identifies several indicators such as control of fasting glucose and lipid profiles, employment status, and address district that can help rural physicians rapidly assess potential long-term glycemic control upon a patient's initial presentation.

In conclusion, this study offers valuable insights of glycemic control for rural healthcare providers and policy makers, underscoring the need for targeted interventions to improve access to diabetic care in rural areas, such as mobile health services and community-based health education programs. This research also calls for larger-scale studies to further investigate the causal relationships and to explore additional factors affecting glycemic control in rural diabetic population, which could inform policy and healthcare strategies tailored to these communities.

# Acknowledgements

The authors would like to express gratitude to medical team of Mobile Health Care for collecting subjects' profiles and appreciate the Biostatistics Center, Kaohsiung Chang Gung Memorial Hospital for statistics work.

# Reference

1. International Diabetes Federation.IDF Diabetes Atlas, 10th edn. Brussels, Belgium: 2021. Available from: <https://www.diabetesatlas.org>.
2. Sheen YJ, Hsu CC, Jiang YD, Huang CN, Liu JS, Sheu WH. Trends in prevalence and incidence of diabetes mellitus from 2005 to 2014 in Taiwan. J Formos Med Assoc. 2019;118 Suppl 2:S66-s73. Epub 20190709. doi: 10.1016/j.jfma.2019.06.016. PubMed PMID: 31300322.
3. Bommer C, Heesemann E, Sagalova V, Manne-Goehler J, Atun R, Bärnighausen T, et al. The global economic burden of diabetes in adults aged 20-79 years: a cost-of-illness study. Lancet Diabetes Endocrinol. 2017;5(6):423-30. Epub 20170426. doi: 10.1016/s2213-8587(17)30097-9. PubMed PMID: 28456416.
4. Wang CY, Wu YL, Sheu WH, Tu ST, Hsu CC, Tai TY. Accountability and utilization of diabetes care from 2005 to 2014 in Taiwan. J Formos Med Assoc. 2019;118 Suppl 2:S111-S21. Epub 20191004. doi: 10.1016/j.jfma.2019.08.010. PubMed PMID: 31590971.
5. Tai SY, He JS, Kuo CT, Kawachi I. Urban-Rural Disparities in the Incidence of Diabetes-Related Complications in Taiwan: A Propensity Score Matching Analysis. J Clin Med. 2020;9(9). Epub 20200918. doi: 10.3390/jcm9093012. PubMed PMID: 32962006; PubMed Central PMCID: PMC7565280.
6. Chatterjee S, Davies MJ, Heller S, Speight J, Snoek FJ, Khunti K. Diabetes structured self-management education programmes: a narrative review and current innovations. Lancet Diabetes Endocrinol. 2018;6(2):130-42. Epub 20170929. doi: 10.1016/s2213-8587(17)30239-5. PubMed PMID: 28970034.
7. Dugani SB, Mielke MM, Vella A. Burden and management of type 2 diabetes in rural United States. Diabetes Metab Res Rev. 2021;37(5):e3410. Epub 20201005. doi: 10.1002/dmrr.3410. PubMed PMID: 33021052; PubMed Central PMCID: PMC7990742.

- 356 8. Wang Q, Zhang X, Fang L, Guan Q, Guan L, Li Q. Prevalence, awareness,  
357 treatment and control of diabetes mellitus among middle-aged and elderly people in a  
358 rural Chinese population: A cross-sectional study. PLoS One. 2018;13(6):e0198343.  
359 Epub 20180601. doi: 10.1371/journal.pone.0198343. PubMed PMID: 29856828;  
360 PubMed Central PMCID: PMC5983453.
- 361 9. Li CH, Li CC, Lu CL, Wu JS, Ku LE, Li CY. Urban-rural disparity in lower  
362 extremities amputation in patients with diabetes after nearly two decades of universal  
363 health Insurance in Taiwan. BMC Public Health. 2020;20(1):212. Epub 20200211.  
364 doi: 10.1186/s12889-020-8335-3. PubMed PMID: 32046698; PubMed Central  
365 PMCID: PMC7014711.
- 366 10. Lee CM, Chang CC, Pan MY, Chang CF, Chen MY. Insufficient early detection  
367 of peripheral neurovasculopathy and associated factors in rural diabetes residents of  
368 Taiwan: a cross-sectional study. BMC Endocr Disord. 2014;14:89. Epub 20141124.  
369 doi: 10.1186/1472-6823-14-89. PubMed PMID: 25421066; PubMed Central PMCID:  
370 PMC4255455.
- 371 11. Chen CC, Chen LW, Cheng SH. Rural-urban differences in receiving guideline-  
372 recommended diabetes care and experiencing avoidable hospitalizations under a  
373 universal coverage health system: evidence from the past decade. Public Health.  
374 2017;151:13-22. Epub 20170708. doi: 10.1016/j.puhe.2017.06.009. PubMed PMID:  
375 28697373.
- 376 12. Biswas RK, Kabir E. Influence of distance between residence and health  
377 facilities on non-communicable diseases: An assessment over hypertension and  
378 diabetes in Bangladesh. PLoS One. 2017;12(5):e0177027. Epub 20170518. doi:  
379 10.1371/journal.pone.0177027. PubMed PMID: 28545074; PubMed Central PMCID:  
380 PMC5436657.
- 381 13. Fukuoka R, Takeda M, Abe T, Yamasaki M, Kimura S, Okuyama K, et al.  
382 Inconvenience of Living Place Affects Individual HbA1c Level in a Rural Area in  
383 Japan: Shimane CoHRE Study. Int J Environ Res Public Health. 2021;18(3). Epub  
384 20210128. doi: 10.3390/ijerph18031147. PubMed PMID: 33525428; PubMed Central  
385 PMCID: PMC7908499.
- 386 14. LePage AK, Wise JB, Bell JJ, Tumin D, Smith AW. Distance from the  
387 endocrinology clinic and diabetes control in a rural pediatric population. J Pediatr  
388 Endocrinol Metab. 2021;34(2):187-93. Epub 20201012. doi: 10.1515/jpem-2020-  
389 0332. PubMed PMID: 33544546.
- 390 15. Nouhjah S, Shahbazian H, Jahanfar S, Shahbazian N. The effect of distance on  
391 the adherence to postpartum follow-up in women with gestational diabetes. Environ  
392 Sci Pollut Res Int. 2021;28(46):65428-34. Epub 20210728. doi: 10.1007/s11356-021-  
393 15472-3. PubMed PMID: 34318425.



- 394 16. Strauss K, MacLean C, Troy A, Littenberg B. Driving distance as a barrier to  
395 glycemic control in diabetes. J Gen Intern Med. 2006;21(4):378-80. doi:  
396 10.1111/j.1525-1497.2006.00386.x. PubMed PMID: 16686817; PubMed Central  
397 PMCID: PMCPMC1484707.
- 398 17. ElSayed NA, Aleppo G, Aroda VR, Bannuru RR, Brown FM, Bruemmer D, et  
399 al. 2. Classification and Diagnosis of Diabetes: Standards of Care in Diabetes-2023.  
400 Diabetes Care. 2023;46(Supplement\_1):S19-s40. doi: 10.2337/dc23-S002. PubMed  
401 PMID: 36507649.
- 402 18. *DAROC Clinical Practice Guidelines for Type 2 Diabetes Care- 2022*, Taiwan,  
403 Diabetes Association of the R.O.C., 2022.
- 404 19. Zgibor JC, Gieraltowski LB, Talbott EO, Fabio A, Sharma RK, Hassan K. The  
405 association between driving distance and glycemic control in rural areas. J Diabetes  
406 Sci Technol. 2011;5(3):494-500. Epub 20110501. doi:  
407 10.1177/193229681100500304. PubMed PMID: 21722565; PubMed Central PMCID:  
408 PMCPMC3192616.
- 409 20. Cheng BR, Chang HT, Lin MH, Chen TJ, Chou LF, Hwang SJ. Rural-urban  
410 disparities in family physician practice patterns: A nationwide survey in Taiwan. Int J  
411 Health Plann Manage. 2019;34(1):e464-e73. Epub 20180920. doi: 10.1002/hpm.2662.  
412 PubMed PMID: 30238506.
- 413 21. International Diabetes Federation (IDF) (2015) Diabetes Atlas. 7th Edition,  
414 International Diabetes Federation, Brussels, Belgium. Available from:  
415 <http://www.diabetesatlas.org>.
- 416 22. Pourkazemi A, Ghanbari A, Khojamli M, Balo H, Hemmati H, Jafaryparvar Z, et  
417 al. Diabetic foot care: knowledge and practice. BMC Endocr Disord. 2020;20(1):40.  
418 Epub 20200320. doi: 10.1186/s12902-020-0512-y. PubMed PMID: 32192488;  
419 PubMed Central PMCID: PMCPMC7083045.
- 420 23. Mizouri R, Belhadj M, Hasni Y, Maaroufi A, Mahjoub F, Jamoussi H.  
421 Relationship between level of education and podiatry risk in diabetic patients. Tunis  
422 Med. 2021;99(2):277-84. PubMed PMID: 33899199; PubMed Central PMCID:  
423 PMCPMC8636960.
- 424 24. Slåtsve KB, Claudi T, Lappegård KT, Jenum AK, Larsen M, Nøkleby K, et al.  
425 Level of education is associated with coronary heart disease and chronic kidney  
426 disease in individuals with type 2 diabetes: a population-based study. BMJ Open  
427 Diabetes Res Care. 2022;10(5). doi: 10.1136/bmjdr-2022-002867. PubMed PMID:  
428 36171015; PubMed Central PMCID: PMCPMC9528574.
- 429 25. Ghazanfari Z, Haghdooost AA, Alizadeh SM, Atapour J, Zolala F. A Comparison  
430 of HbA1c and Fasting Blood Sugar Tests in General Population. Int J Prev Med.  
431 2010;1(3):187-94. PubMed PMID: 21566790; PubMed Central PMCID:

432 PMCPMC3075530.

433 26. Mayega RW, Guwatudde D, Makumbi FE, Nakwagala FN, Peterson S, Tomson  
 434 G, et al. Comparison of fasting plasma glucose and haemoglobin A1c point-of-care  
 435 tests in screening for diabetes and abnormal glucose regulation in a rural low income  
 436 setting. *Diabetes Res Clin Pract.* 2014;104(1):112-20. Epub 20140103. doi:  
 437 10.1016/j.diabres.2013.12.030. PubMed PMID: 24456993.

438 27. Rotllan N, Julve J, Escolà-Gil JC. Type 2 Diabetes and HDL dysfunction: a key  
 439 contributor to Glycemic Control. *Curr Med Chem.* 2023. Epub 20230201. doi:  
 440 10.2174/0929867330666230201124125. PubMed PMID: 36722477.

441 28. Waldman B, Jenkins AJ, Sullivan D, Ng MKC, Keech AC. HDL as a Target for  
 442 Glycemic Control. *Curr Drug Targets.* 2017;18(6):651-73. doi:  
 443 10.2174/1389450116666150727115544. PubMed PMID: 26212264.

444

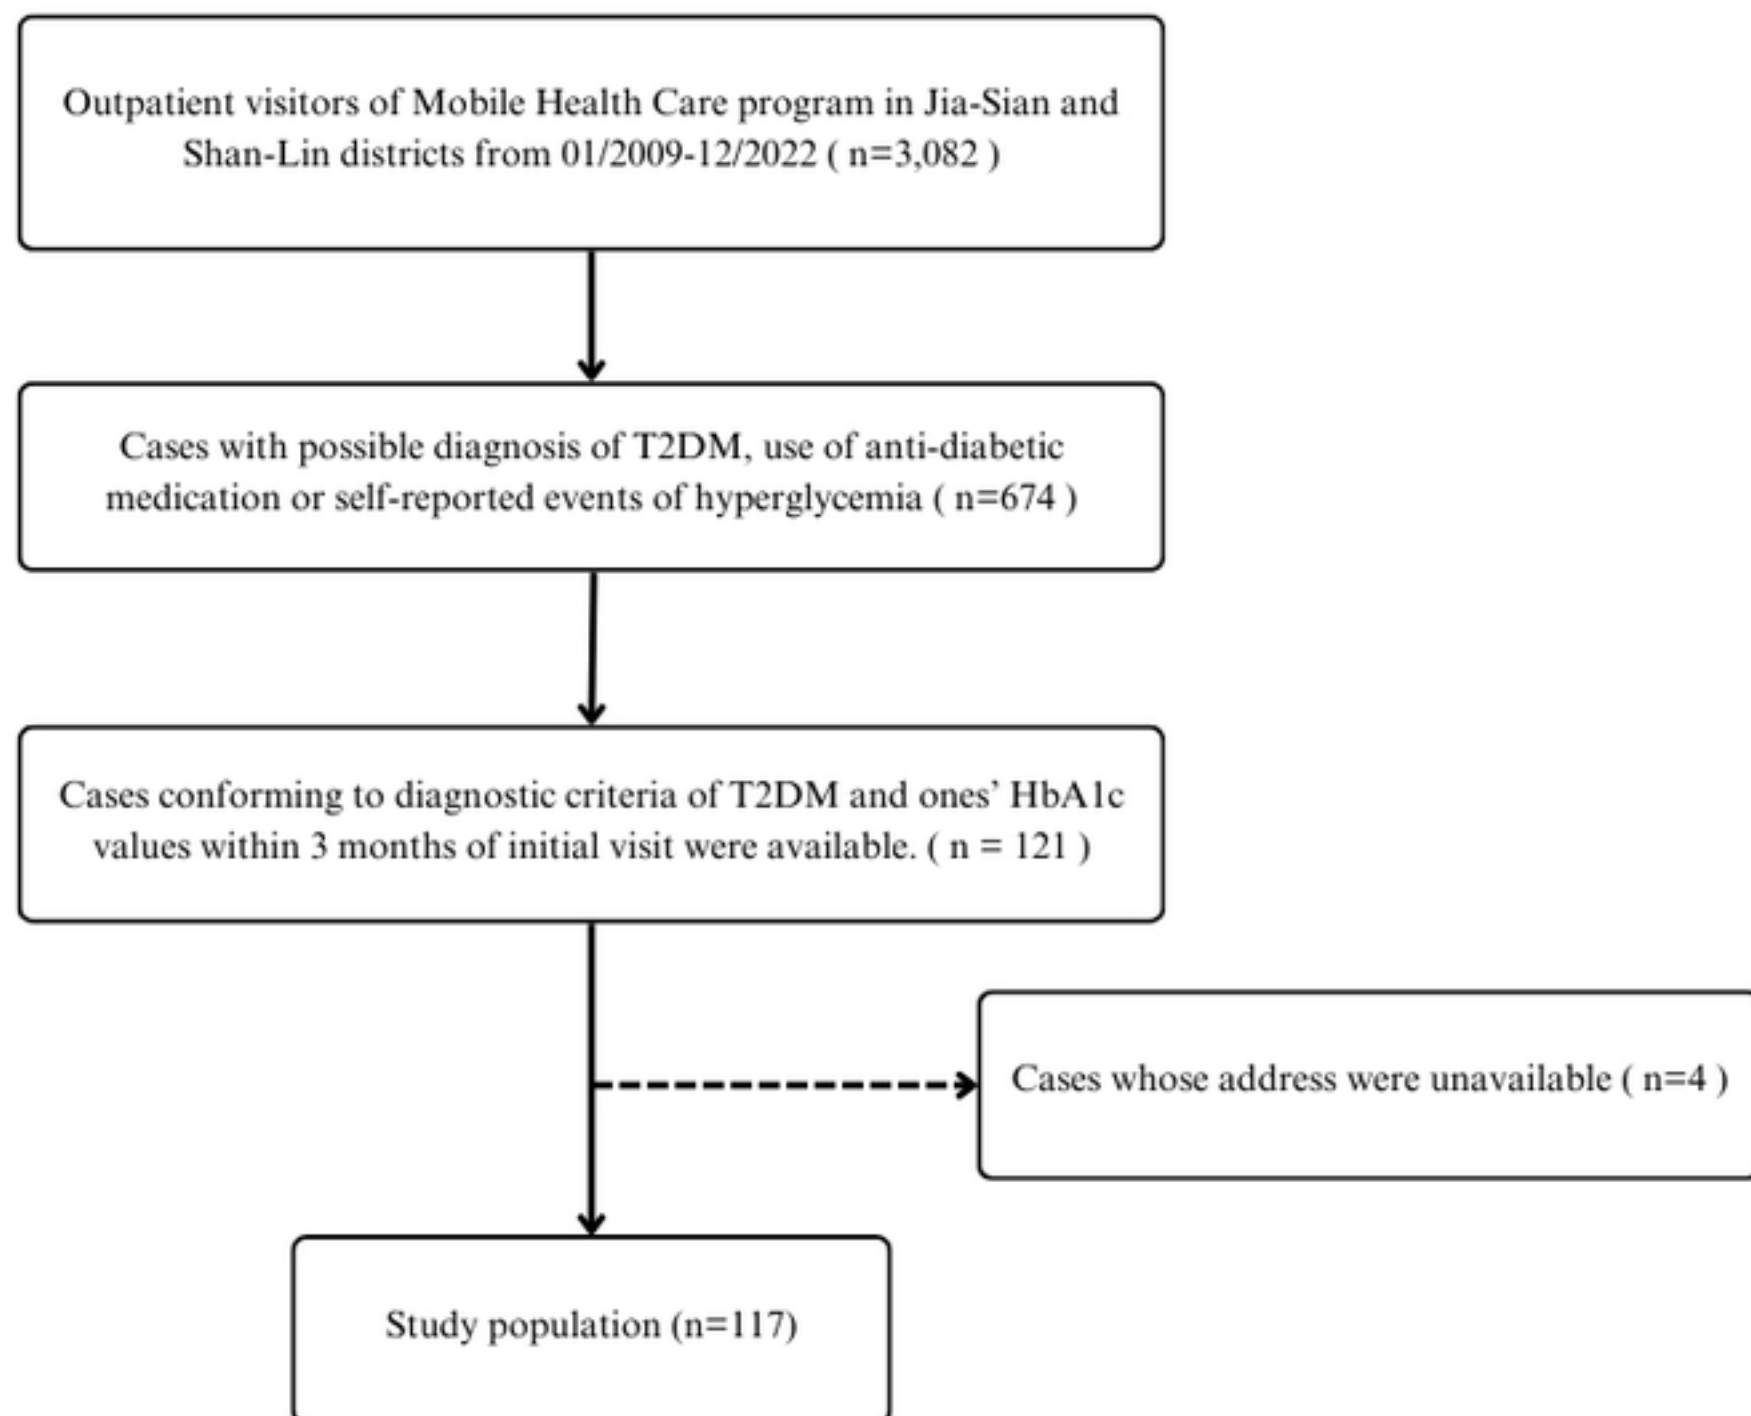

Figure
